# Supplementary material for: High-yielding syntheses of hydrophilic conjugatable chlorins and bacteriochlorins
Source: Royal Society of Chemistry journal article supplement (doi:10.1039/b908713c), 2009-01-01
Supplement: b908713c.pdf [file b908713c.pdf]

Electronic Supplementary Information for:

# High-yielding syntheses of hydrophilic, conjugatable chlorins and bacteriochlorins

*Jason R. McCarthy,<sup>1\*</sup> Jayeeta Bhaumik,<sup>1</sup> Nabyl Merbouh,<sup>2</sup> and Ralph Weissleder<sup>1</sup>*

1. Center for Molecular Imaging Research and Center for Systems Biology, Harvard Medical School and Massachusetts General Hospital, 149 13th St., Rm 5406, Charlestown, MA 02129,

USA

2. Department of Chemistry, Simon Fraser University, 8888 University Drive, Burnaby,

BC V5A 1S6, Canada

## Table of Contents

|                                                      | Page    |
|------------------------------------------------------|---------|
| 1. General procedure for hydrolysis of side products | S2      |
| 2. NMR spectra                                       | S3-S12  |
| 3. HPLC traces                                       | S12-S14 |
| 4. References                                        | S15     |

### **1. General procedure for the hydrolysis of side product in the synthesis of 3.**

All side products from the synthesis of **3** (~ 5 g) were combined and suspended in ethanol (100 mL). To this was added aq KOH (5 M, 200 mL), and the suspension was refluxed for 18 h, at which point the solution was allowed to cool to RT and was filtered to remove the hydrolyzed product. The porphyrin **1**, was purified as described previously.<sup>1</sup>

## 2. NMR spectra and HPLC traces

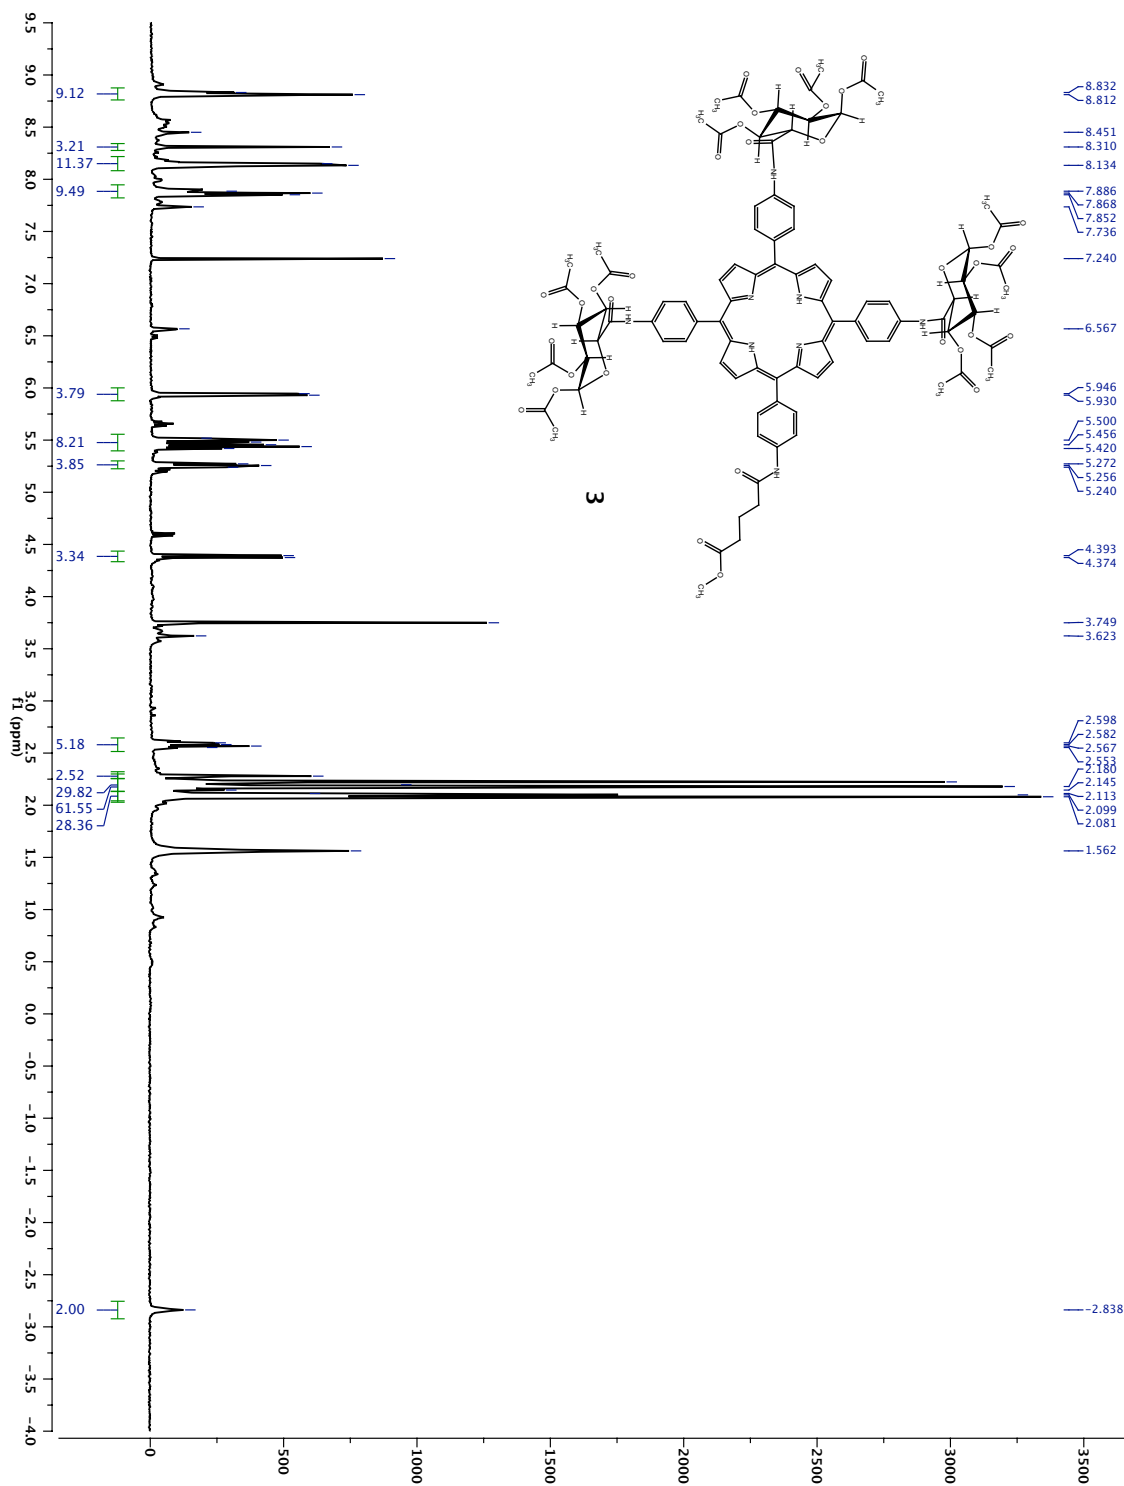

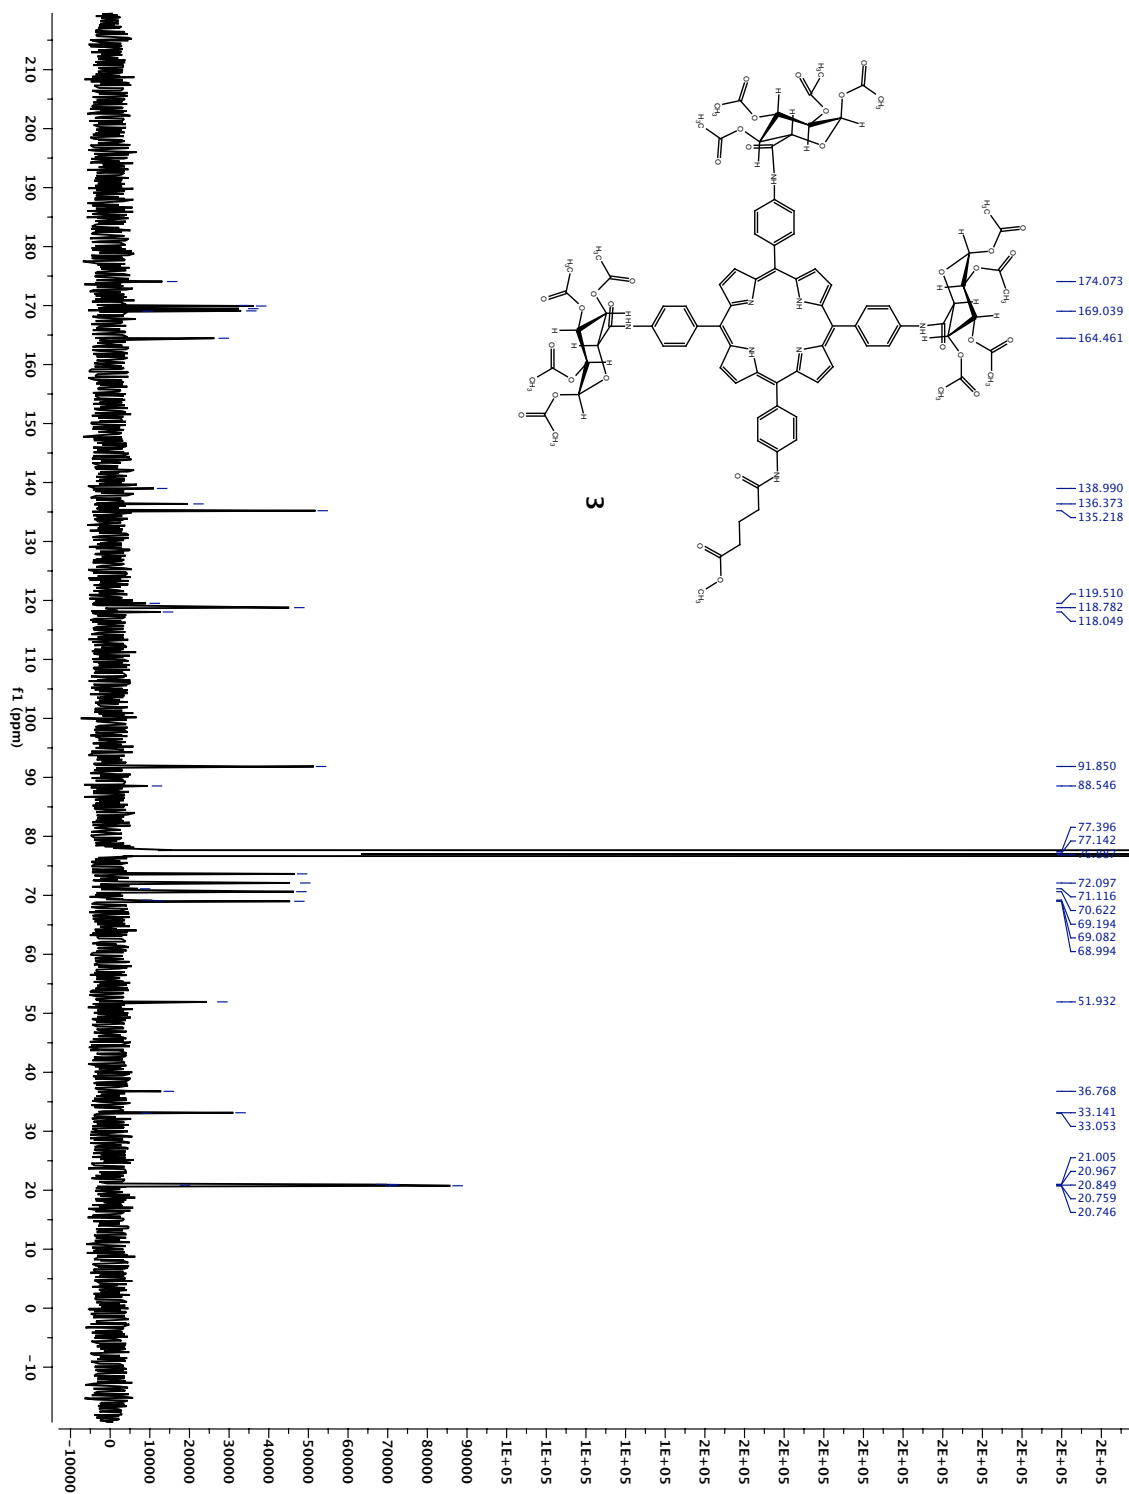

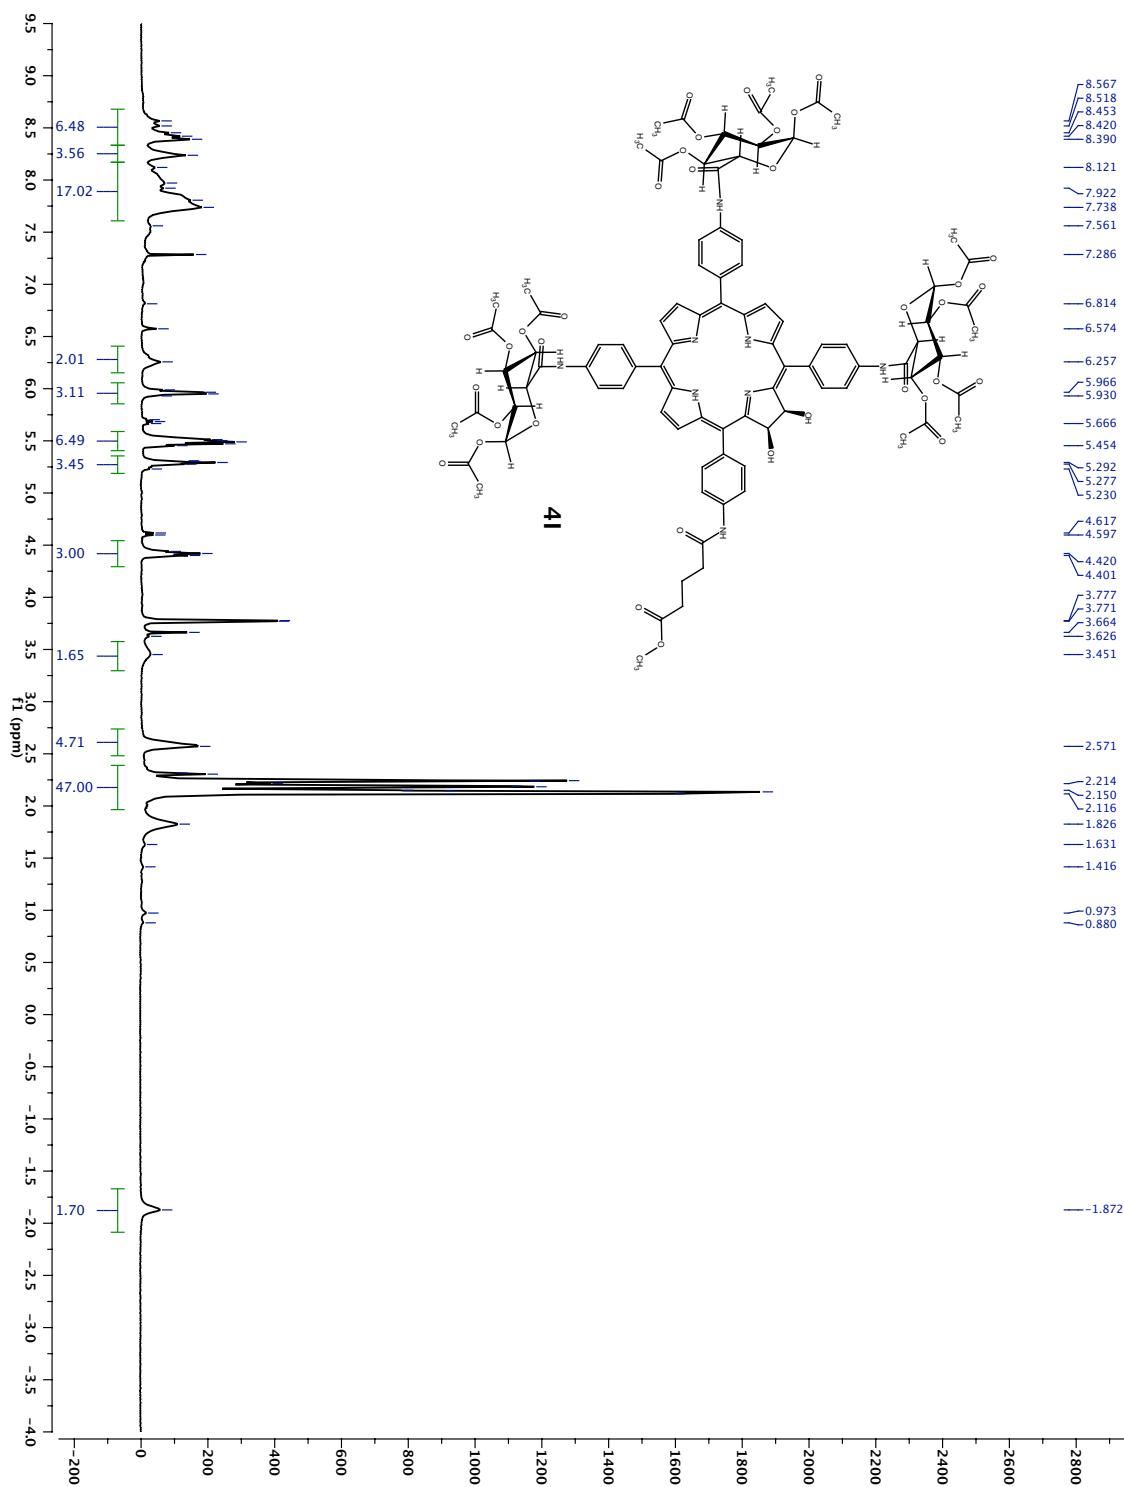

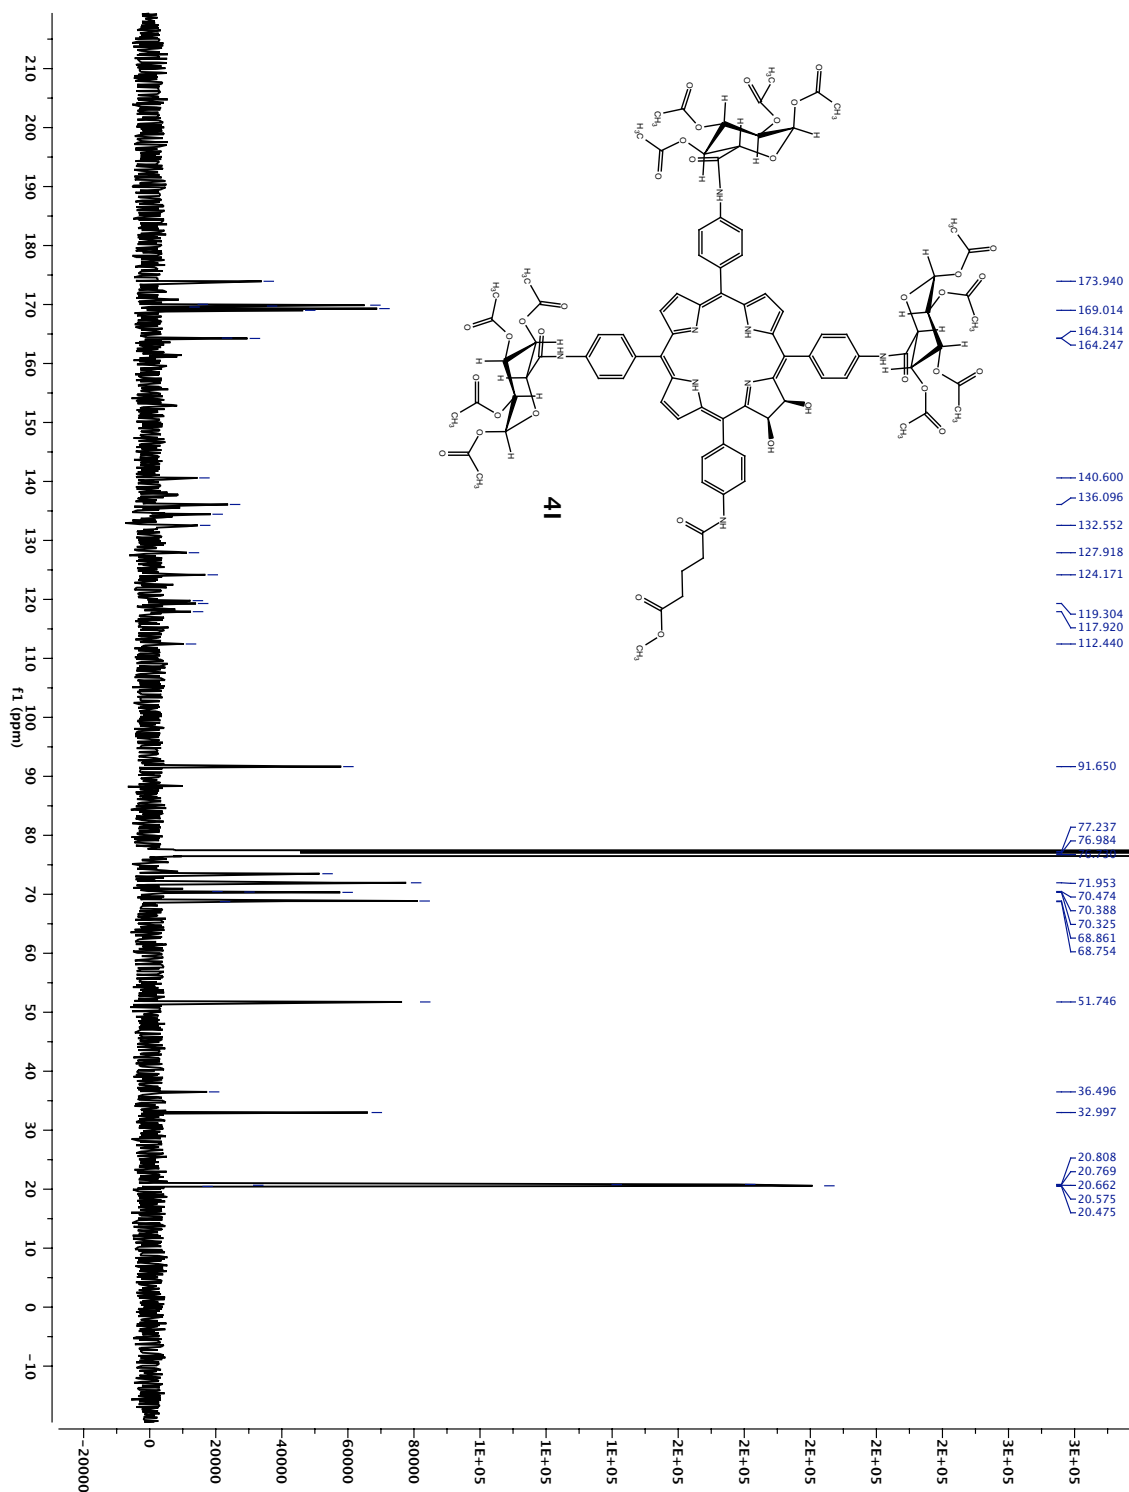

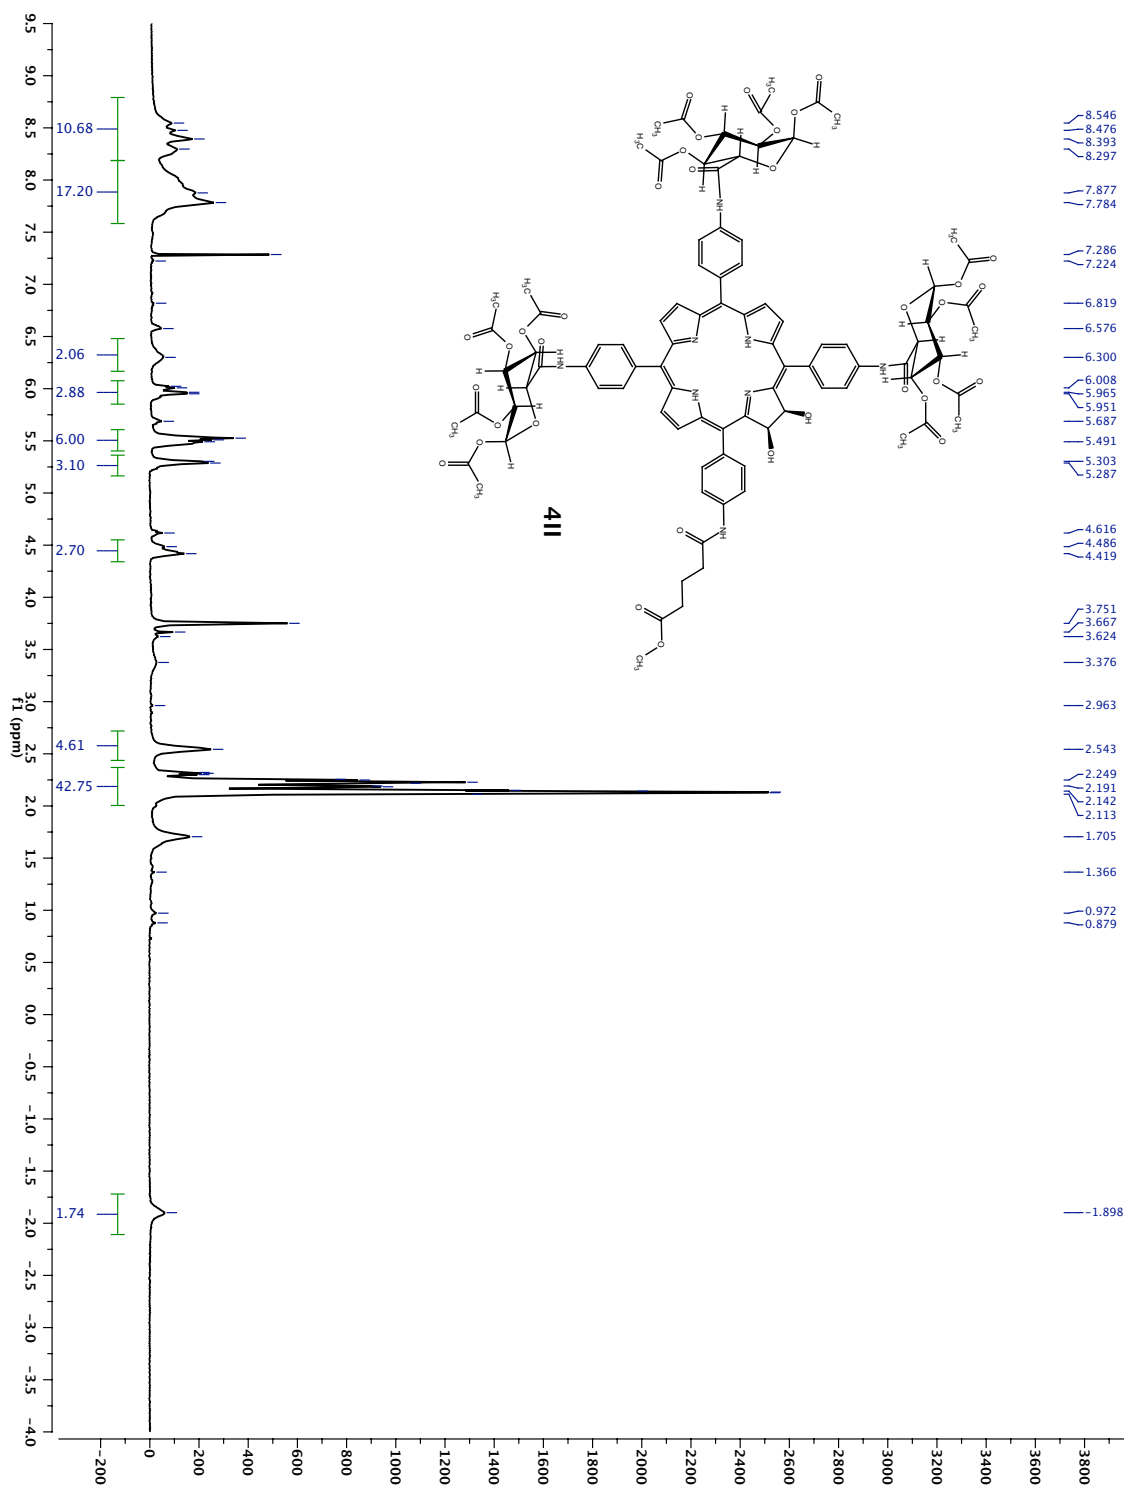

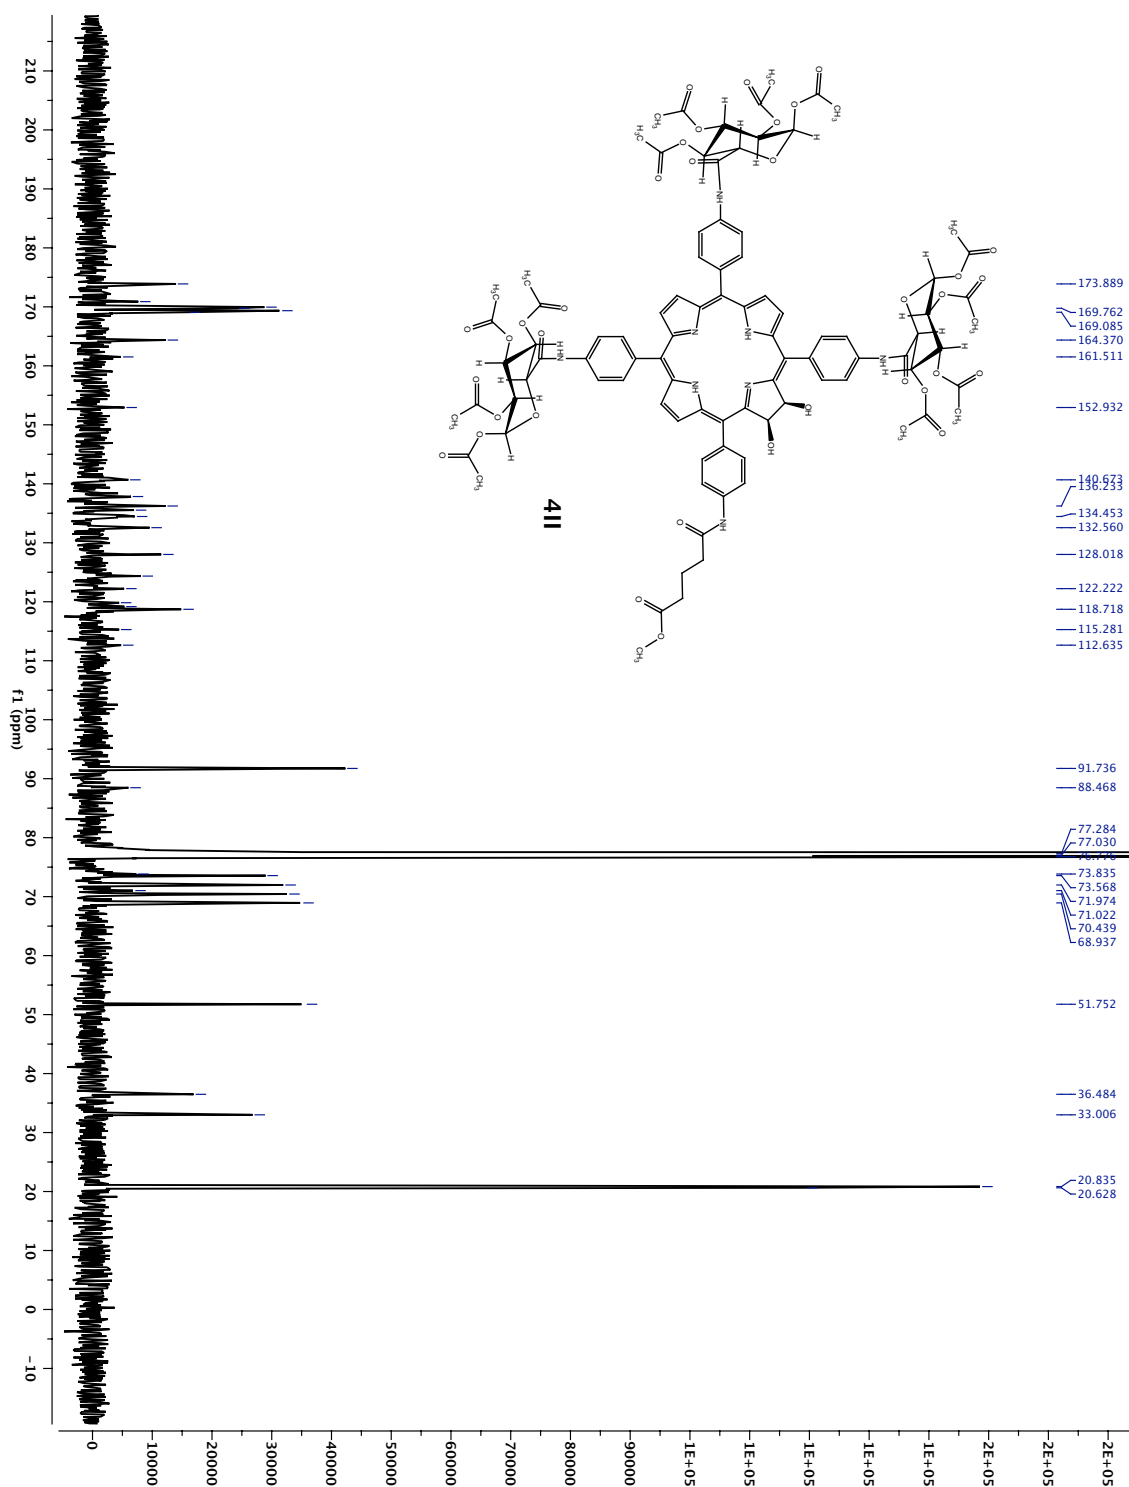



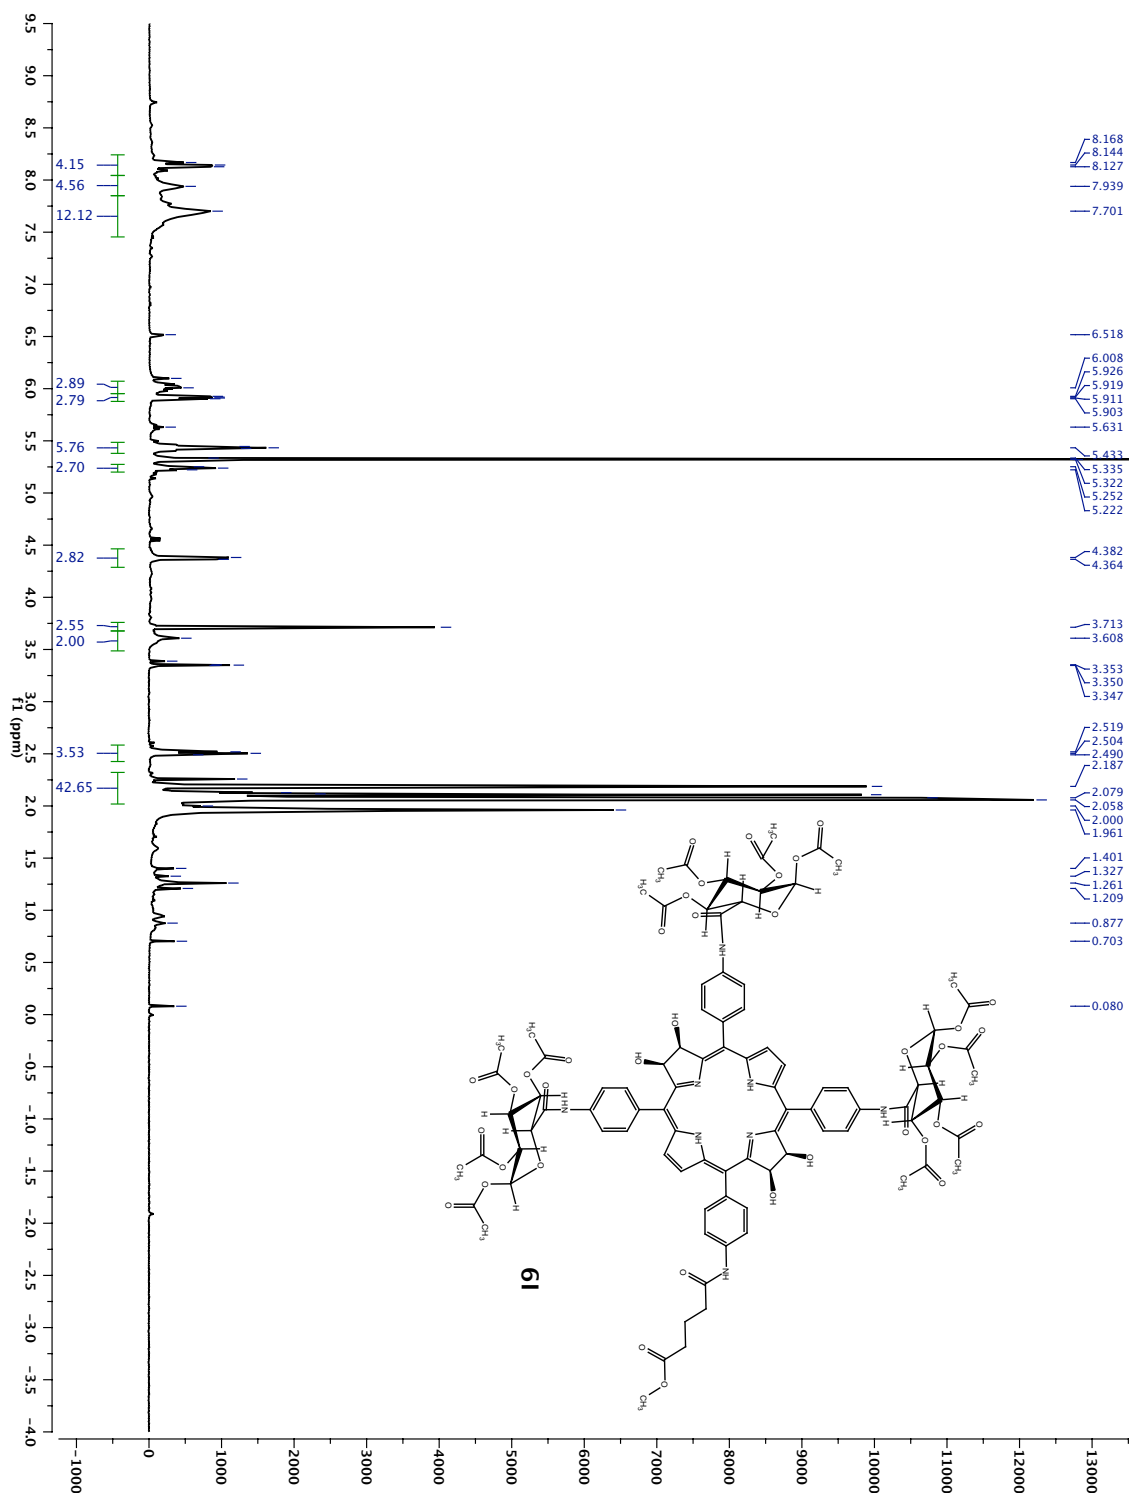

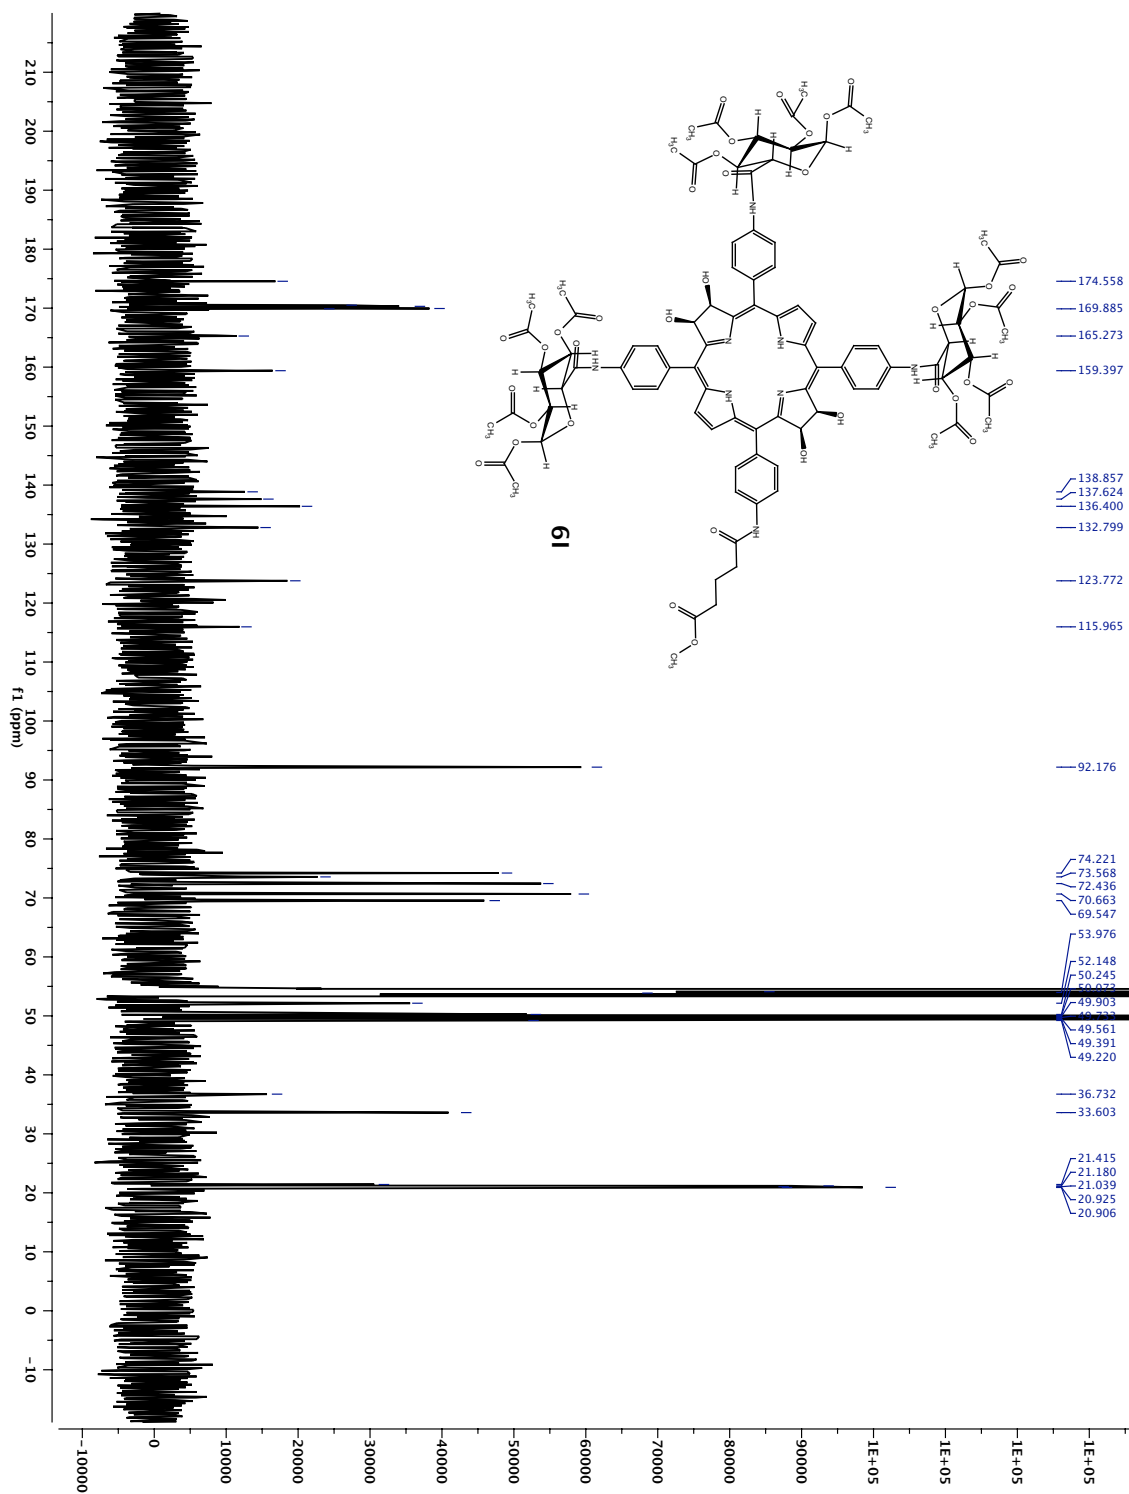

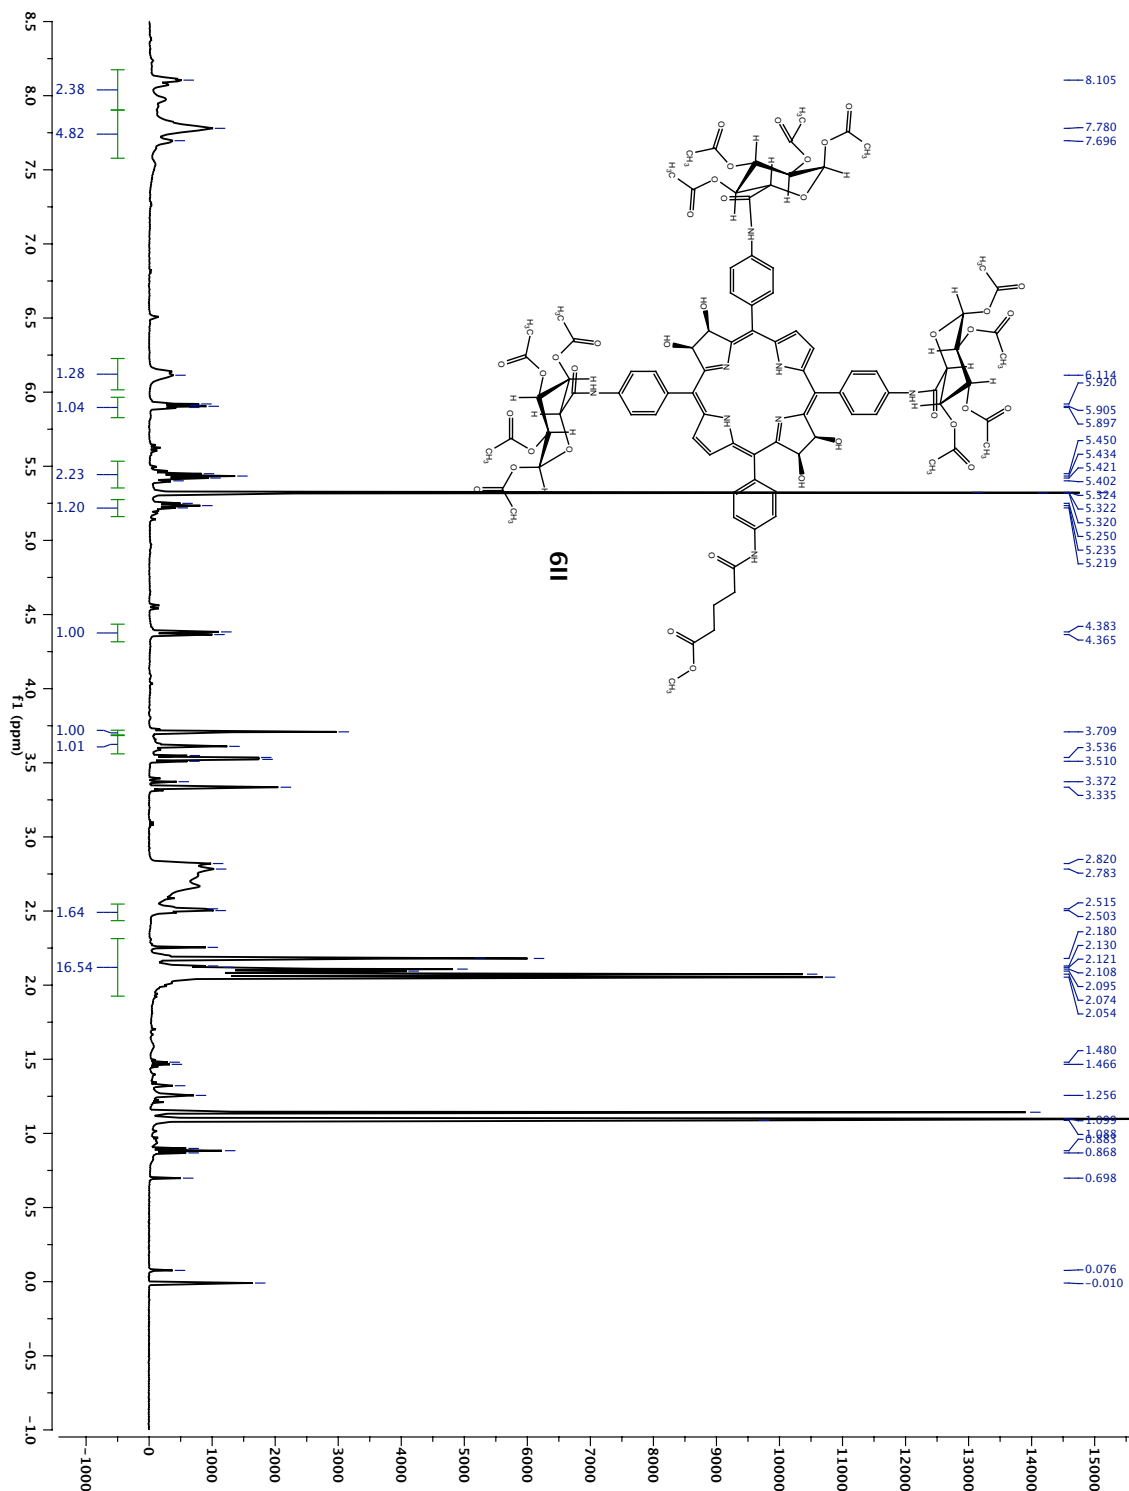

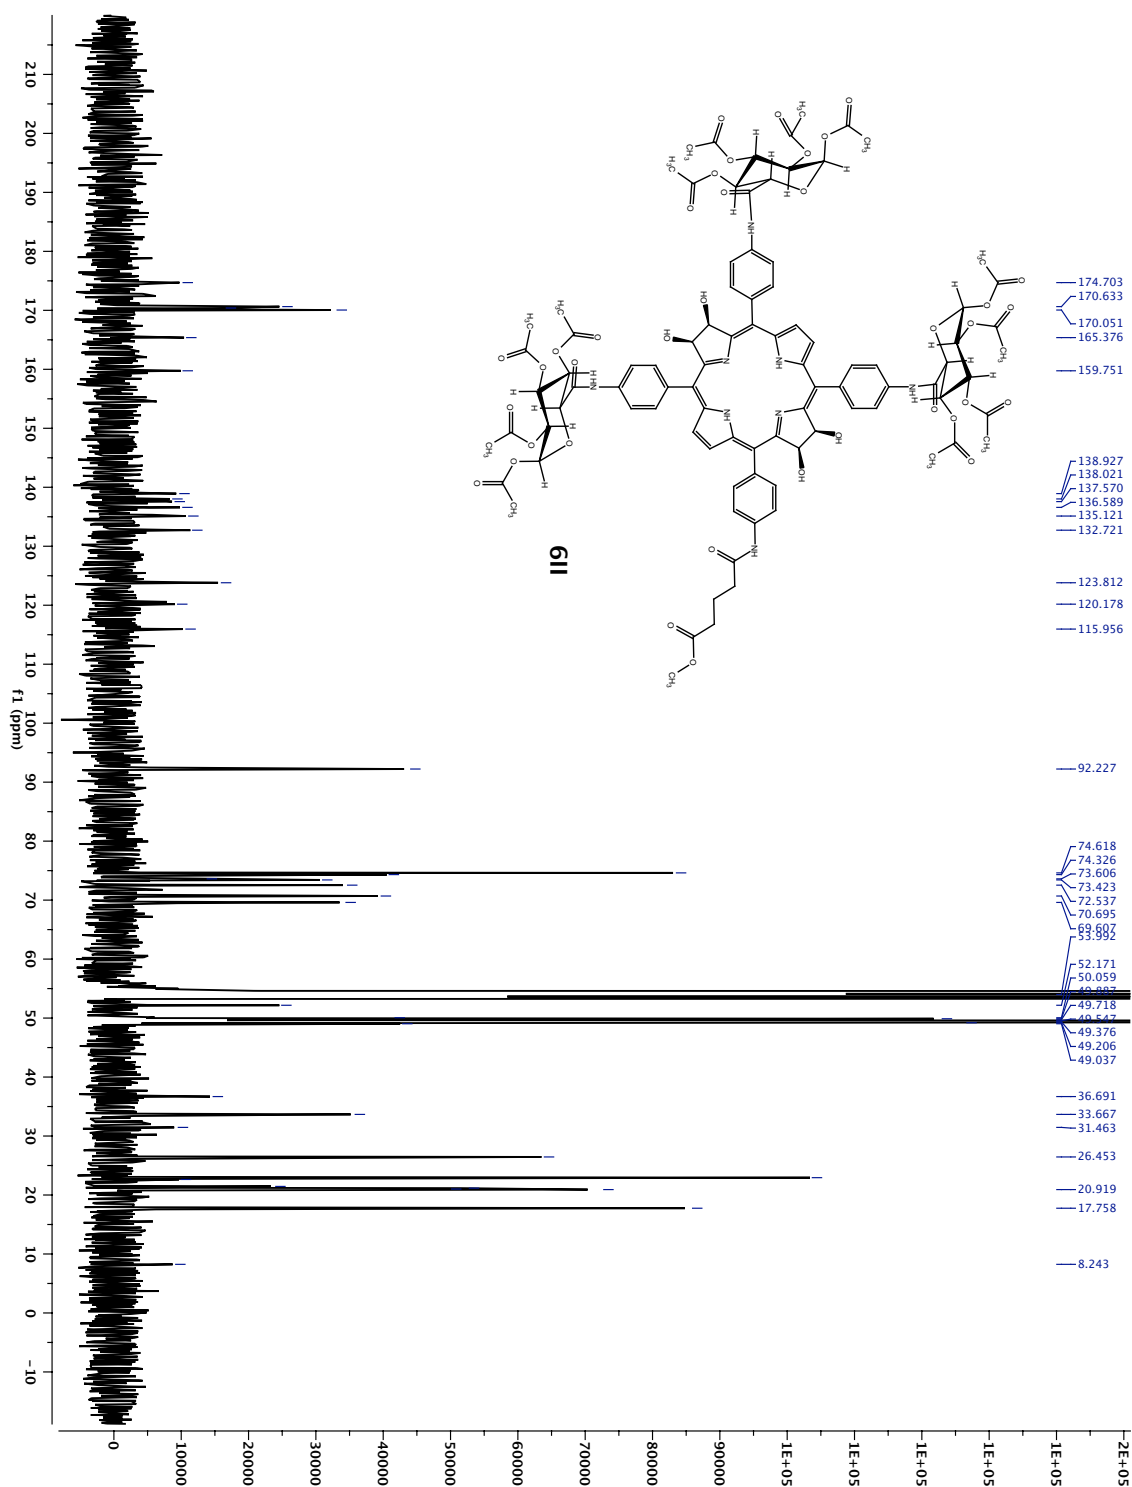

### 3. HPLC of deprotected chlorins and bacteriochlorins

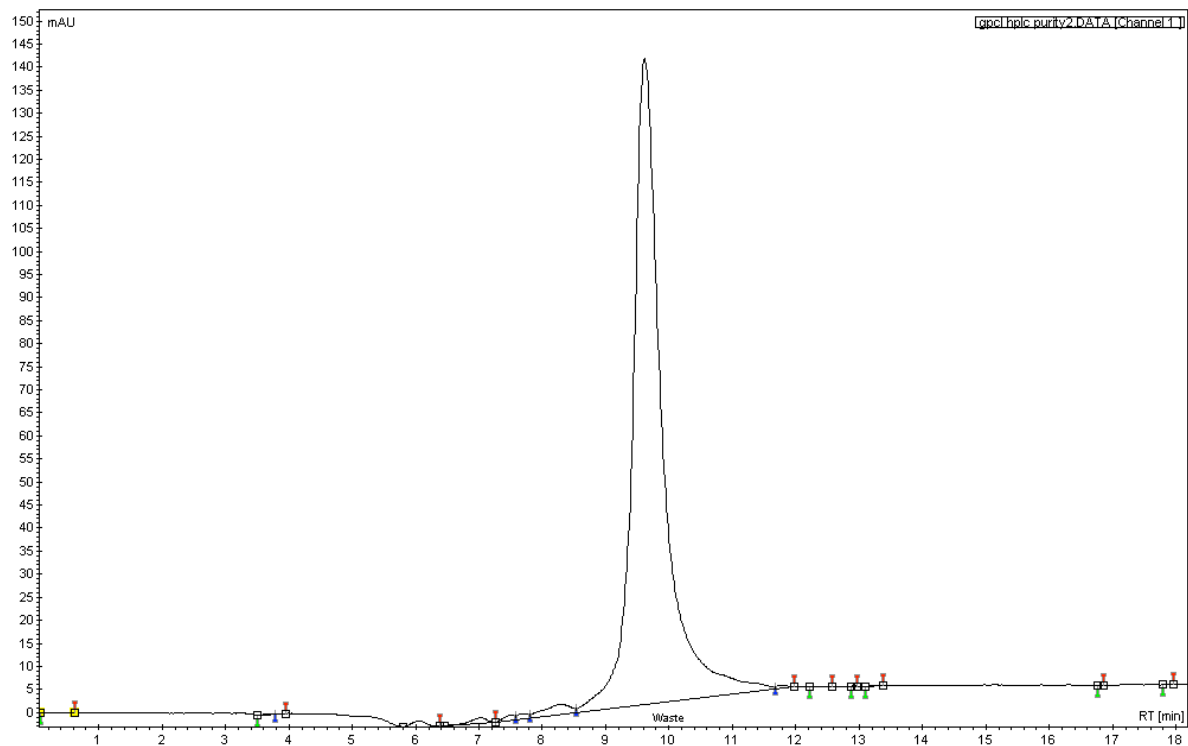

**5I** (Gradient from 100% to 0% Buffer A)

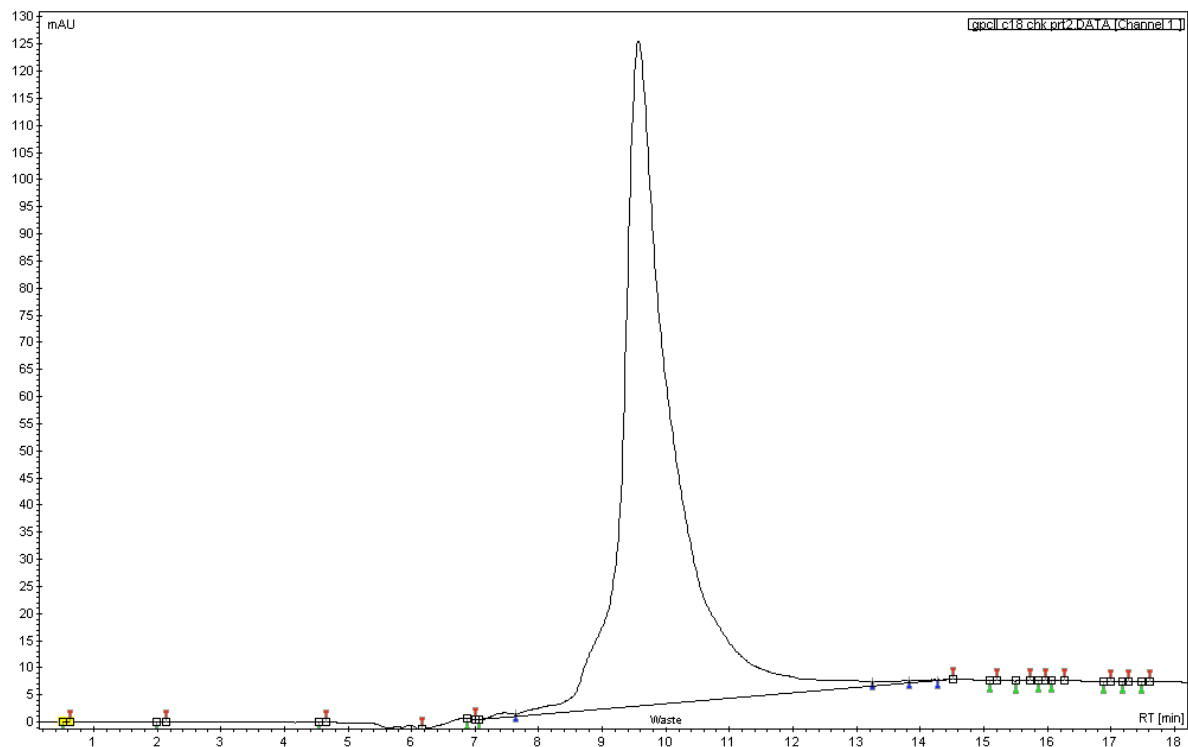

**5II** (Gradient from 100% to 0% Buffer A)

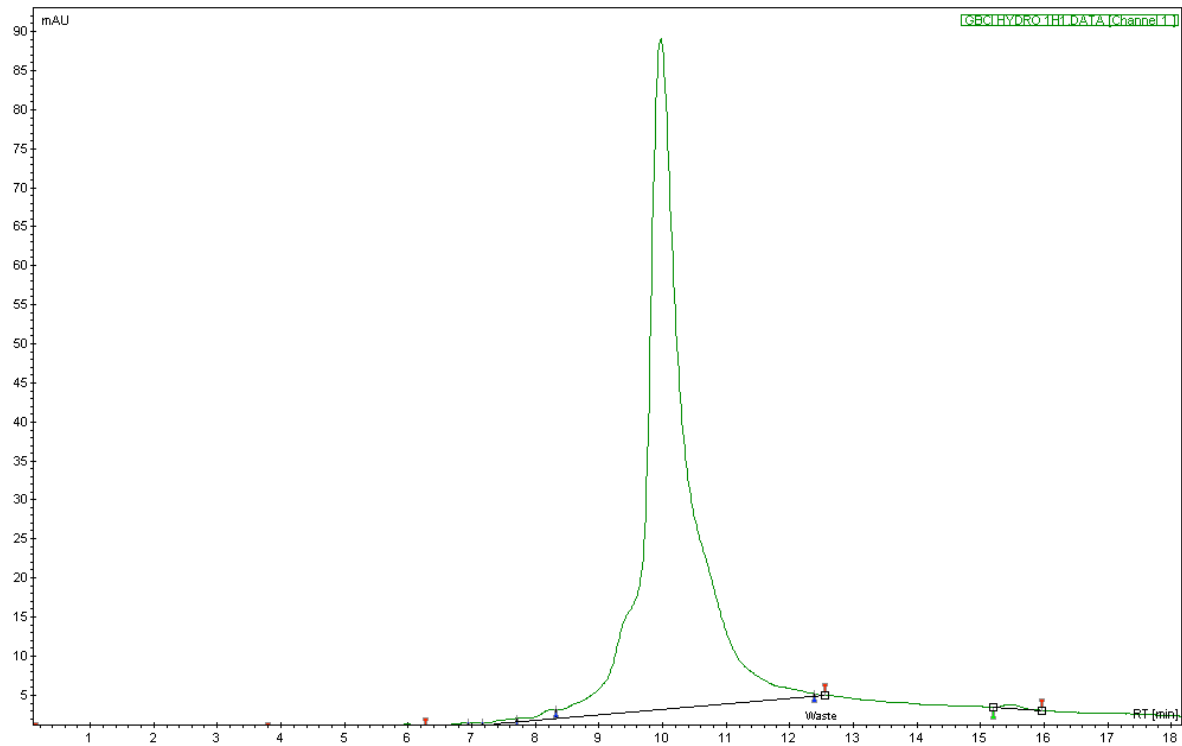

**7I** (Gradient from 100% to 0% Buffer A)

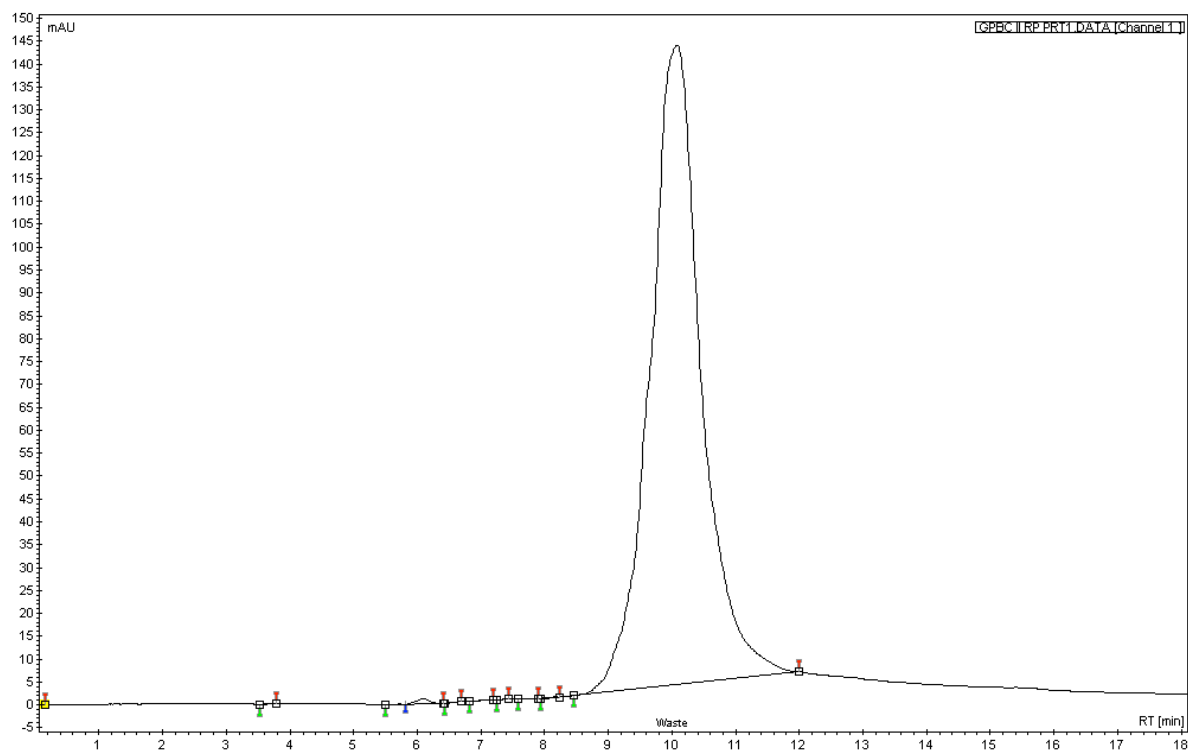

**7II** (Gradient from 100% to 0% Buffer A)

## References

- (1) M. Yuasa, K. Oyaizu, A. Yamaguchi, and M. Kuwakado, *J. Am. Chem. Soc.*, 2004, **126**, 11128.
